# Supplementary material for: The NPM1 Mutation Type Has No Impact on Survival in Cytogenetically Normal AML
Source: PubMed Central journal article supplement (PMC4192029; doi:10.1371/journal.pone.0109759), 2014-10-09
Supplement: pone.0109759.s001.pdf [file pone.0109759.s001.pdf]

## Data Supplement

### The *NPM1* mutation type has no impact on survival in cytogenetically normal AML

#### *NPM1* mutation type does not influence outcome - Subgroup analyses

##### A) *NPM1* mutation type A versus rare type mutations

###### in 292 patients receiving chemotherapy only

In 292 patients receiving chemotherapy only as consolidation treatment, the prognostic effect of a *NPM1*-A versus *NPM1*-RA mutation was not significantly different with respect to OS ( $p=0.579$ ) and RFS ( $p=0.630$ ) in all patients (**Figure S3A and S3C**), nor in patients with a *FLT3*-ITD (OS:  $p=0.795$ ; RFS:  $p=0.286$ ) or without a *FLT3*-ITD (OS:  $p=0.273$ ; RFS:  $p=0.463$ ) (**Figure S3B and S3D**). Multivariable Cox regression analyses in these patients revealed the same risk factors as in censored analyses - a high WBC, older age and presence of a *FLT3*-ITD - for a shorter OS and RFS, but the type of *NPM1* mutation (type A versus rare type; type A versus type B versus type D versus other *NPM1* mutation) was not significant.

###### in 330 patients with de novo AML

Analyses performed in 330 patients with de novo AML revealed a lack of significance of the *NPM1*-A versus *NPM1*-RA mutation type on OS and RFS in all patients (**Figure S4A and S4C**), those with and those without an additional *FLT3*-ITD (**Figure S4B and S4D**) and in multivariable Cox regression in which only WBC, age and *FLT3*-ITD showed an impact in OS and RFS.

###### in patients <60 and $\geq 60$ years of age

In 197 patients <60 years and 152 patients  $\geq 60$  years, OS ( $p=0.756$ ,  $p=0.375$ , respectively) and RFS ( $p=0.593$ ,  $p=0.402$ , respectively) were not different between patients with *NPM1*-A and *NPM1*-RA (**Figures S5A - S5D**) and the *NPM1* mutation type did not impact on OS and RFS in multivariable analyses.

Similar results were obtained for younger and older patients in *NPM1*-A/*FLT3*-ITD-, *NPM1*-A/*FLT3*-ITD+, *NPM1*-RA/*FLT3*-ITD-, *NPM1*-RA/*FLT3*-ITD+ subgroups for OS and RFS (data not shown).

**B) *NPM1* mutation types A versus B versus D versus other mutations  
in 292 patients receiving chemotherapy only**

The *NPM1* mutation types *NPM1-A* versus *NPM1-B* versus *NPM1-D* versus *NPM1-others* did not reveal significant differences with regard to OS and RFS, neither in all patients ( $p=0.936$   $p=0.970$ , respectively), nor in patients with or without an additional *FLT3*-ITD (data not shown). Multivariable Cox regression revealed the same risk factors for an adverse OS and RFS as for all patients.

**Table S1: Characteristics of *NPM1*-mutated patients and comparison between those with type A and rare type with or without a *FLT3*-ITD**

| Characteristic                                                                     | all<br>(n=349)    | <i>NPM1</i> -A<br>(n=268) | <i>NPM1</i> -RA<br>(n=81) | <i>p1</i> | <i>NPM1</i> -A /<br><i>FLT3</i> -ITD-<br>(n=161) | <i>NPM1</i> -A /<br><i>FLT3</i> -ITD+<br>(n=107) | <i>NPM1</i> -RA /<br><i>FLT3</i> -ITD-<br>(n=47) | <i>NPM1</i> -RA /<br><i>FLT3</i> -ITD+<br>(n=34) | <i>p2</i> | <i>p3</i> | <i>p4</i> |
|------------------------------------------------------------------------------------|-------------------|---------------------------|---------------------------|-----------|--------------------------------------------------|--------------------------------------------------|--------------------------------------------------|--------------------------------------------------|-----------|-----------|-----------|
| Age, years<br>median<br>range                                                      | 57<br>19-85       | 57<br>19-85               | 57<br>19-78               | 0.870     | 58<br>22-80                                      | 56<br>19-85                                      | 57<br>30-75                                      | 58<br>19-78                                      | 0.799     | 0.642     | 0.698     |
| White blood count, G/L (n=347)<br>median<br>range                                  | 35.7<br>0.1-798.2 | 33.9<br>0.1-798.2         | 41.5<br>0.5-486.0         | 0.552     | 24.1<br>0.7-798.2                                | 46.1<br>0.1-440.3                                | 18.1<br>0.5-169.0                                | 75.0<br>4.3-486.0                                | 0.171     | 0.005     | <0.001    |
| Platelets, G/L (n=347)<br>median<br>range                                          | 61<br>5-367       | 63<br>5-367               | 60<br>12-282              | 0.714     | 66<br>5-339                                      | 52<br>7-367                                      | 65<br>14-268                                     | 60<br>12-282                                     | 0.683     | 0.975     | 0.440     |
| Hemoglobin level, g/L (n=346)<br>median<br>range                                   | 92<br>42-164      | 91<br>47-164              | 92<br>42-142              | 0.845     | 91<br>53-164                                     | 92<br>47-139                                     | 90<br>54-123                                     | 9.5<br>42-142                                    | 0.770     | 0.951     | 0.826     |
| LDH level, U/l (n=345)<br>median<br>range                                          | 494<br>23-14332   | 490<br>23-14332           | 557<br>190-7434           | 0.302     | 429<br>23-5560                                   | 711<br>171-14332                                 | 434<br>190-3221                                  | 843<br>291-7434                                  | 0.738     | 0.058     | <0.001    |
| Bone marrow blasts, % (n=327)<br>median<br>range                                   | 85<br>20-100      | 85<br>20-100              | 90<br>20-100              | 0.830     | 84<br>20-100                                     | 90<br>20-100                                     | 80<br>20-100                                     | 90<br>25-100                                     | 0.589     | 0.441     | 0.001     |
| Female sex, n (%)                                                                  | 212 (61)          | 164 (61)                  | 48 (59)                   | 0.755     | 92 (57)                                          | 72 (67)                                          | 26 (55)                                          | 22 (65)                                          | 0.824     | 0.781     | 0.308     |
| Performance status (ECOG), n (%)<br>(n=340)                                        |                   |                           |                           | 0.475     |                                                  |                                                  |                                                  |                                                  | 0.139     | 0.825     | 0.121     |
| 0                                                                                  | 80 (24)           | 64 (25)                   | 16 (20)                   |           | 40 (26)                                          | 24 (23)                                          | 8 (17)                                           | 8 (13)                                           |           |           |           |
| 1                                                                                  | 147 (43)          | 107 (41)                  | 40 (50)                   |           | 68 (44)                                          | 39 (38)                                          | 30 (64)                                          | 10 (30)                                          |           |           |           |
| 2                                                                                  | 80 (24)           | 61 (24)                   | 19 (24)                   |           | 34 (22)                                          | 27 (26)                                          | 8 (17)                                           | 11 (33)                                          |           |           |           |
| 3                                                                                  | 25 (7)            | 22 (9)                    | 3 (4)                     |           | 12 (8)                                           | 10 (10)                                          | 1 (2)                                            | 2 (6)                                            |           |           |           |
| 4                                                                                  | 8 (2)             | 6 (2)                     | 2 (3)                     |           | 2 (1)                                            | 4 (4)                                            | 0 (0)                                            | 2 (6)                                            |           |           |           |
| Origin of AML, n (%)                                                               |                   |                           |                           | 0.817     |                                                  |                                                  |                                                  |                                                  | 0.974     | 0.678     | 0.758     |
| de novo                                                                            | 330 (95)          | 253 (94)                  | 77 (95)                   |           | 150 (93)                                         | 103 (96)                                         | 44 (94)                                          | 33 (97)                                          |           |           |           |
| sAML                                                                               | 12 (3)            | 10 (4)                    | 2 (3)                     |           | 8 (5)                                            | 2 (2)                                            | 2 (4)                                            | 0 (0)                                            |           |           |           |
| tAML                                                                               | 7 (2)             | 5 (2)                     | 2 (3)                     |           | 3 (2)                                            | 2 (2)                                            | 1 (2)                                            | 1 (3)                                            |           |           |           |
| <i>FLT3</i> -ITD mRNA mutation level<br>in patients with <i>FLT3</i> -ITD+ (n=124) |                   |                           |                           | 0.688     |                                                  |                                                  |                                                  |                                                  | NA        | 0.688     | 0.688     |
| ... median                                                                         | 0.42              | 0.42                      | 0.46                      |           | NA                                               | 0.42                                             | NA                                               | 0.46                                             |           |           |           |
| ....range                                                                          | (0.01-0.98)       | (0.04-0.97)               | (0.01-0.98)               |           |                                                  | 0.04-0.97                                        |                                                  | 0.01-0.98                                        |           |           |           |
| mo <i>CEBPA</i> +, n (%) (n=348)                                                   | 12 (3)            | 11 (4)                    | 1 (1)                     | 0.219     | 4 (3)                                            | 7 (7)                                            | 1 (2)                                            | 0 (0)                                            | 0.904     | 0.126     | 0.174     |
| bi <i>CEBPA</i> +, n (%) (n=348)                                                   | 0 (0)             | 0 (0)                     | 0 (0)                     | NA        | 0 (0)                                            | 0 (0)                                            | 0 (0)                                            | 0 (0)                                            | NA        | NA        | NA        |

| Characteristic             | all<br>(n=349) | <i>NPM1-A</i><br>(n=268) | <i>NPM1-RA</i><br>(n=81) | <i>p1</i> | <i>NPM1-A / FLT3-ITD-</i><br>(n=161) | <i>NPM1-A / FLT3-ITD+</i><br>(n=107) | <i>NPM1-RA / FLT3-ITD-</i><br>(n=47) | <i>NPM1-RA / FLT3-ITD+</i><br>(n=34) | <i>p2</i> | <i>p3</i> | <i>p4</i> |
|----------------------------|----------------|--------------------------|--------------------------|-----------|--------------------------------------|--------------------------------------|--------------------------------------|--------------------------------------|-----------|-----------|-----------|
| Induction regimen, n (%)   |                |                          |                          | 0.941     |                                      |                                      |                                      |                                      | 0.901     | 0.728     | 0.743     |
| TAD                        | 58 (17)        | 44 (16)                  | 15 (17)                  |           | 29 (18)                              | 15 (14)                              | 10 (21)                              | 4 (12)                               |           |           |           |
| HAM                        | 69 (20)        | 54 (20)                  | 15 (19)                  |           | 34 (21)                              | 20 (19)                              | 8 (17)                               | 7 (21)                               |           |           |           |
| TAD-HAM                    | 121 (35)       | 91 (34)                  | 30 (37)                  |           | 50 (31)                              | 41 (38)                              | 14 (30)                              | 16 (47)                              |           |           |           |
| HAM-HAM                    | 101 (29)       | 79 (30)                  | 22 (27)                  |           | 48 (30)                              | 31 (29)                              | 15 (32)                              | 7 (21)                               |           |           |           |
| Allogeneic transplantation | 57 (16)        | 45 (17)                  | 12 (15)                  | 0.673     | 25 (16)                              | 20 (19)                              | 7 (15)                               | 5 (15)                               | 0.916     | 0.596     | 0.885     |
| OS, months                 |                |                          |                          | 0.589     |                                      |                                      |                                      |                                      | 0.262     | 0.646     | <0.001    |
| median                     | 45.6           | 40.7                     | 73.3                     |           | 79.7                                 | 10.1                                 | 97.8                                 | 10.7                                 |           |           |           |
| events, n (%)              | 151 (57)       | 153 (57)                 | 45 (56)                  |           | 58 (36)                              | 57 (53)                              | 15 (32)                              | 21 (62)                              |           |           |           |
| CR                         | 260 (75)       | 201 (75)                 | 59 (73)                  | 0.696     | 121 (75)                             | 80 (75)                              | 38 (81)                              | 21 (62)                              | 0.418     | 0.143     | 0.268     |
| RFS, years (n=258)         |                |                          |                          | 0.827     |                                      |                                      |                                      |                                      | 0.418     | 0.256     | <0.001    |
| median                     | 37.1           | 35.7                     | 44.0                     |           | 53.9                                 | 7.0                                  | 81.4                                 | 7.0                                  |           |           |           |
| events, n (%)              | 115 (55)       | 86 (43)                  | 29 (49)                  |           | 44 (37)                              | 42 (53)                              | 15 (39)                              | 14 (67)                              |           |           |           |

**Abbreviations:** bi*CEBPA*+, biallelic mutation of the CCAAT/enhancer-binding protein alpha gene; CR, complete remission; de novo AML; origin of AML de novo; ECOG, performance status according to the Eastern Cooperative Oncology Group; ELN, European Leukemia Net; *FLT3-ITD+*, presence of an internal tandem duplication in the *fms*-related tyrosine 3 gene; *FLT3-ITD-*, absence of an internal tandem duplication in the *fms*-related tyrosine 3 gene; HAM, high-dose cytarabine, mitoxantrone; LDH, lactate dehydrogenase; mo*CEBPA*+, mutation of the CCAAT/enhancer-binding protein alpha gene; n, number; NA, not applicable; *NPM1+*, presence of a mutation in the nucleophosmin gene; *NPM1-A*, mutation in the nucleophosmin gene leading to the insertion of the tetranucleotide TCTG; *NPM1-RA*, mutation in the nucleophosmin gene other than type A, OS, Overall survival; RFS, Relapse-free survival; sAML, secondary AML; TAD, thioguanine, cytarabine, daunorubicin; tAML, therapy-related AML, v, versus.

*p1*: *NPM1-A* versus *NPM1-RA*

*p2*: *NPM1-A / FLT3-ITD-* versus *NPM1-RA / FLT3-ITD-*

*p3*: comparison: *NPM1-A / FLT3-ITD+* versus *NPM1-RA / FLT3-ITD+*

*p4*: comparison: all four *NPM1*-type/ *FLT3-ITD* combinations

**Table S2: Frequency of different types of *NPM1* mutations**

| type<br>nucleotide | number | frequency (%) | Wt<br>253-260 | Insert | Wt<br>261-265 | Insert  | Wt               |
|--------------------|--------|---------------|---------------|--------|---------------|---------|------------------|
| A                  | 268    | 76.8          | gatctctg      | tctg   | gcagt         | -       | ggaggaagtctcttt  |
| B                  | 19     | 5.4           | gatctctg      | catg   | gcagt         | -       | ggaggaagtctcttt  |
| D                  | 31     | 8.9           | gatctctg      | cctg   | gcagt         | -       | ggaggaagtctcttt  |
| G <sup>·</sup>     | 2      | 0.6           | gatctctg      | cagg   | gcagt         | -       | ggaggaagtctcttt  |
| J <sup>†</sup>     | 4      | 1.1           | gatctctg      | tatg   | gcagt         | -       | ggaggaagtctcttt  |
| K <sub>m</sub>     | 3      | 0.9           | gatctctg      | ccgg   | gcagt         | -       | ggaggaagtctcttt  |
| M <sub>m</sub>     | 1      | 0.3           | gatctctg      | -      | gcag          | agga    | tggaggaagtctcttt |
| N <sub>m</sub>     | 4      | 1.1           | gatctctg      | ccag   | gcagt         | -       | ggaggaagtctcttt  |
| P <sub>m</sub>     | 6      | 1.7           | gatctctg      | cttg   | gcagt         | -       | ggaggaagtctcttt  |
| Q <sub>m</sub>     | 1      | 0.3           | gatctctg      | tcgg   | gcagt         | -       | ggaggaagtctcttt  |
| 13                 | 1      | 0.3           | gatctctg      | taag   | gcagt         | -       | ggaggaagtctcttt  |
| M <sup>*</sup>     | 1      | 0.3           | gatctctg      | ccgcct | agt           | -       | ggaggaagtctcttt  |
| P <sup>*</sup>     | 2      | 0.6           | gatctctg      | caag   | gcagt         | -       | ggaggaagtctcttt  |
| S <sup>*</sup>     | 1      | 0.3           | gatctct       | ct     | gcag          | cct     | tggaggaagtctcttt |
| T <sup>*</sup>     | 1      | 0.3           | gatctctg      | ccgc   | gcagt         | -       | ggaggaagtctcttt  |
| U <sup>*</sup>     | 1      | 0.3           | gatctctg      | -      | gcagtg        | ttttccc | aagtctcttt       |
| W <sup>*</sup>     | 1      | 0.3           | gatctctg      | caca   | gcagt         | -       | ggaggaagtctcttt  |
| X <sup>*</sup>     | 1      | 0.3           | gatct         | ttgc   | ctggcagt      | -       | ggaggaagtctcttt  |
| Y <sup>*</sup>     | 1      | 0.3           | gatctctg      | tagg   | gcagt         | -       | ggaggaagtctcttt  |

Mutations A to D refer to mutations identified by Falini et al.<sup>1</sup>

Mutation G<sup>·</sup> refers to the mutation identified by Cazzaniga et al.<sup>2</sup>

Mutation J<sup>†</sup> refers to the mutation identified by Suzuki et al.<sup>3</sup>

Mutations K<sub>m</sub> to Q<sub>m</sub> refer to mutations identified by Schnittger et al.<sup>4</sup>

Mutation 13 refers to the mutations identified by Döhner et al.<sup>5</sup>

Mutations M<sup>\*</sup> to Y<sup>\*</sup> refer to newly identified mutations identified by our group.

**Abbreviations:** Wt, wild-type

**Table S3: Univariable Cox regression for overall survival (OS) and relapse-free survival (RFS)**

| Variable                               | Comparison                                                                  | OS  |              |             |        | RFS |              |             |        |
|----------------------------------------|-----------------------------------------------------------------------------|-----|--------------|-------------|--------|-----|--------------|-------------|--------|
|                                        |                                                                             | n   | Hazard Ratio | 95% CI      | p      | n   | Hazard Ratio | 95% CI      | p      |
| Age (years)                            | +10 years                                                                   | 349 | 1.5          | 1.3 -1.8    | <0.001 | 259 | 1.2          | 1.1-1.4     | <0.001 |
| WBC (10 <sup>9</sup> /l)               | 10 fold                                                                     | 349 | 2.0          | 1.5-2.7     | <0.001 | 259 | 2.0          | 1.4-2.8     | <0.001 |
| Platelets (10 <sup>9</sup> /l)         | 10 fold                                                                     | 349 | 0.7          | 0.447-1.023 | 0.06   | 259 | 0.6          | 0.412-1.012 | 0.06   |
| Hb (g/l)                               | +1 g/L                                                                      | 349 | 1.0          | 0.994-1.011 | 0.55   | 259 | 1.0          | 0.990-1.009 | 0.92   |
| LDH level (U/l)                        | 10 fold                                                                     | 349 | 2.6          | 1.7-4.1     | <0.001 | 259 | 3.1          | 1.8-5.5     | <0.001 |
| BM blasts (%)                          | +1%                                                                         | 349 | 1.0          | 0.998-1.019 | 0.10   | 259 | 1.0          | 0.998-1.022 | 0.11   |
| Sex                                    | male vs. female                                                             | 349 | 0.8          | 0.704-0.985 | 0.033  | 259 | 0.9          | 0.8-1.1     | 0.39   |
| Performance status (ECOG)              | 2-4 vs. 0,1                                                                 | 349 | 2.0          | 1.4-2.7     | <0.001 | 259 | 1.6          | 1.1-2.4     | 0.014  |
| Origin of AML                          | de novo vs. non de novo                                                     | 349 | 0.9          | 0.4-1.7     | 0.70   | 259 | 1.2          | 0.6-3.1     | 0.63   |
| <i>NPM1</i> mutation type              | <i>NPM1-A</i> vs. <i>NPM1-RA</i>                                            | 349 | 1.1          | 0.8-1.6     | 0.59   | 259 | 1.0          | 0.7-1.6     | 0.83   |
| <i>NPM1</i> mutation type              | <i>NPM1-A</i> vs. <i>NPM1-B</i> vs.<br><i>NPM1-D</i> vs. <i>NPM1-others</i> | 349 | 0.9          | 0.7-1.2     | 0.62   | 259 | 1.0          | 0.8-1.3     | 0.89   |
| <i>FLT3</i> -ITD                       | pos. vs. neg                                                                | 349 | 2.2          | 1.6-3.0     | <0.001 | 259 | 2.7          | 1.8-3.9     | <0.001 |
| interaction term <i>NPM1/FLT3</i> -ITD | pos./pos. vs. pos./neg.                                                     | 349 | 2.2          | 1.6-3.1     | <0.001 | 259 | 2.8          | 2.0-4.1     | <0.001 |
| <i>CEBPA</i>                           | mo <i>CEBPA</i> vs. wt                                                      | 349 | 0.5          | 0.2-1.6     | 0.27   | 259 | 0.7          | 0.2-2.1     | 0.47   |

**Abbreviations:** BM, bone marrow; *CEBPA*, CCAAT/enhancer-binding protein alpha gene; CI, confidence interval; ECOG, Eastern Cooperative Oncology Group; *FLT3*-ITD, internal tandem duplication of the *FLT3* gene; Hb, hemoglobin level; HR, hazard ratio; negative, absence of *FLT3*-ITD; LDH, lactate dehydrogenase level; mo*CEBPA*, monoallelic *CEBPA* mutation; *NPM1*, nucleophosmin gene; *NPM1-A*, mutation in the nucleophosmin gene leading to the insertion of the tetranucleotide TCTG; *NPM1-B*, mutation in the nucleophosmin gene consisting of an insertion of the tetranucleotide CATG, *NPM1-D*, mutation in the nucleophosmin gene consisting of an insertion of the tetranucleotide CCTG, *NPM1-other*, mutation in the nucleophosmin gene other than *NPM1* mutation types A, B, D. *NPM1-RA*, mutation in the nucleophosmin gene other than type A; OS, Overall survival; p, p value; positive, presence of *FLT3*-ITD; RFS, Relapse-free survival; WBC, white blood cell count, wt, wildtype.

**Table S4: Multivariable Cox regression models for OS and RFS in 349 *NPM1*-mutated patients**

| independent prognostic factors | comparison                                                               | OS   |           |        | RFS  |           |        |
|--------------------------------|--------------------------------------------------------------------------|------|-----------|--------|------|-----------|--------|
|                                |                                                                          | HR   | 95% CI    | p      | HR   | 95% CI    | p      |
| Age                            | per 10 years                                                             | 1.71 | 1.44-2.03 | <0.001 | 1.55 | 1.28-1.87 | <0.001 |
| WBC                            | 10 <sup>9</sup> /L, per 10-fold increase                                 | 1.63 | 1.16-2.30 | 0.005  | 1.71 | 1.15-2.56 | 0.009  |
| <i>FLT3</i> -ITD               | positive versus negative                                                 | 2.04 | 1.40-2.96 | <0.001 | 2.45 | 1.60-3.75 | <0.001 |
| <i>NPM1</i> mutation type      | <i>NPM1</i> -A vs <i>NPM1</i> -B vs <i>NPM1</i> -D vs <i>NPM1</i> -other |      |           | 0.879  |      |           | 0.854  |
|                                | <i>NPM1</i> -A vs <i>NPM1</i> -other                                     | 1.18 | 0.63-2.19 | 0.611  | 0.88 | 0.45-1.76 | 0.727  |
|                                | <i>NPM1</i> -A vs <i>NPM1</i> -B                                         | 0.83 | 0.40-1.72 | 0.618  | 0.72 | 0.32-1.58 | 0.409  |
|                                | <i>NPM1</i> -A vs <i>NPM1</i> -D                                         | 1.13 | 0.61-2.09 | 0.691  | 0.98 | 0.49-1.95 | 0.961  |

White blood cell count, platelet count, hemoglobin level, lactate dehydrogenase level, bone marrow blasts, de novo AML versus non de novo AML, performance status, sex, age, type A versus rare type *NPM1* mutation, *FLT3*-ITD, monoallelic *CEBPA* mutations, biallelic *CEBPA* mutations were included in the Cox regression models for OS and RFS with backward elimination. The analyses were performed using 313 patients for OS and 227 RFS who had data for all these variables. A p-value of <0.05 was considered as indicating significant differences. All parameters that did not have a significant impact on OS or RFS are not shown in the table, except for the *NPM1* mutation type.

**Abbreviations:** *CEBPA*, CCAAT/enhancer-binding protein alpha gene; CI, confidence interval; *FLT3*-ITD, internal tandem duplication of the *FLT3* gene; HR, hazard ratio; negative, absence of *FLT3*-ITD; *NPM1*-A, mutation in the nucleophosmin gene consisting of an insertion of the tetranucleotide TCTG; *NPM1*-B, mutation in the nucleophosmin gene consisting of an insertion of the tetranucleotide CATG, *NPM1*-D, mutation in the nucleophosmin gene consisting of an insertion of the tetranucleotide CCTG, *NPM1*-other, mutation in the nucleophosmin gene other than *NPM1* mutation types A, B, D; OS, Overall survival; p, p value; positive, presence of *FLT3*-ITD; RFS, Relapse-free survival; vs, versus; WBC, white blood cell count.

**Figure S1: Overview of patient Selection**

**Abbreviations:** AML, acute myeloid leukemia; AMLCG, AML Cooperative Group; MDS, myelodysplastic syndrome; *NPM1*, mutation in the nucleophosmin gene.

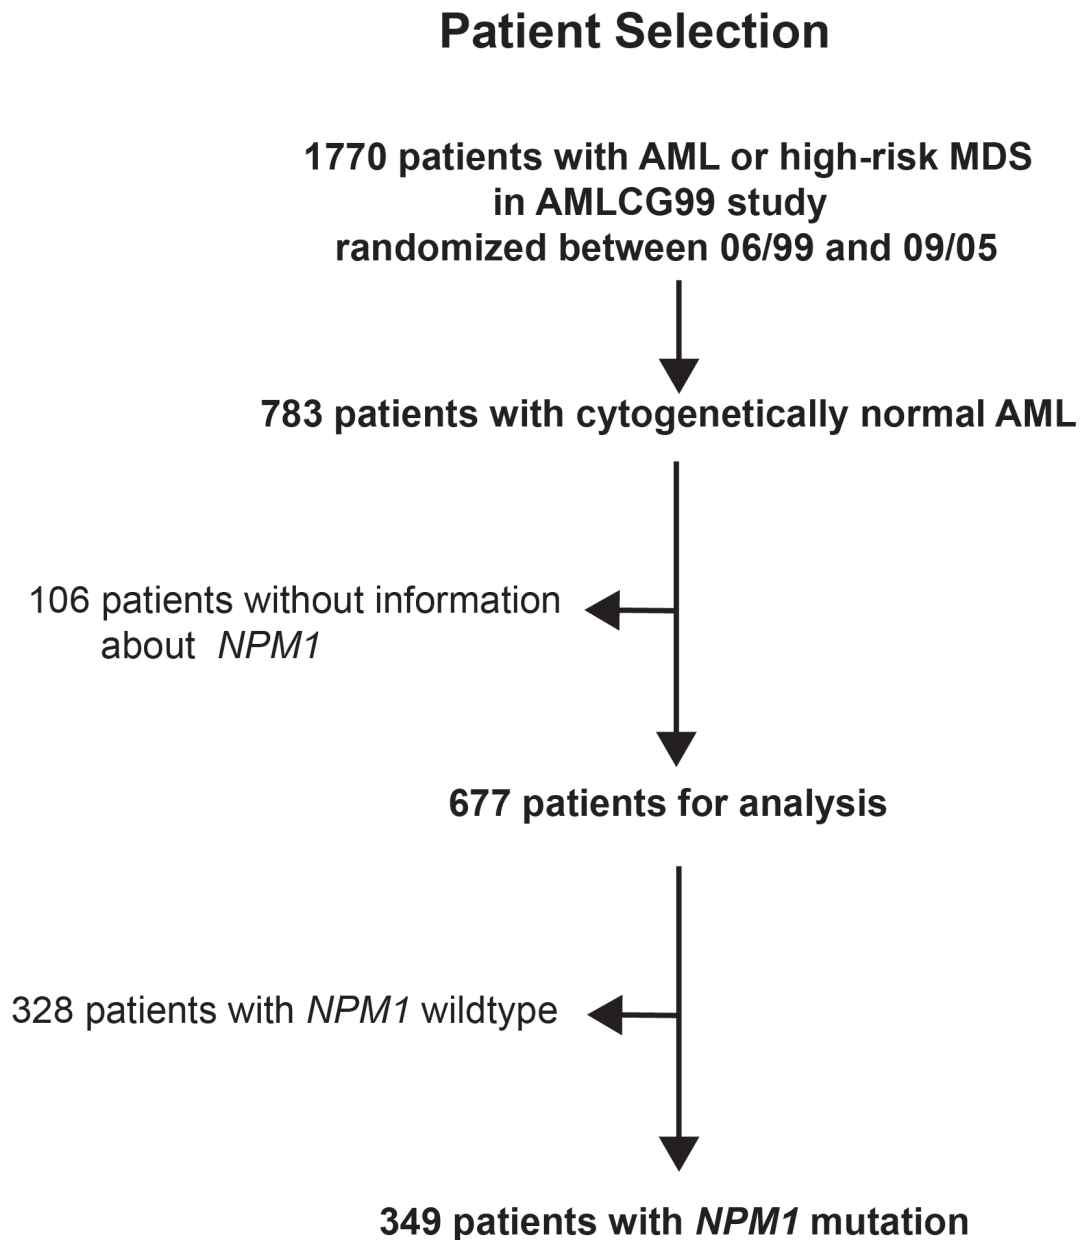



**Figure S2: Influence of a *FLT3*-ITD in 349 *NPM1*-mutated patients on outcome.**

(A) OS in 349 *NPM1*-mutated patients. (B) RFS in *NPM1*-mutated patients in CR.

**Abbreviations:** CR, complete remission; *FLT3*-ITD+, presence of an internal tandem duplication in the *fms*-related tyrosine 3 gene; *FLT3*-ITD-, absence of an internal tandem duplication in the *fms*-related tyrosine 3 gene; *NPM1*, mutation in the nucleophosmin gene

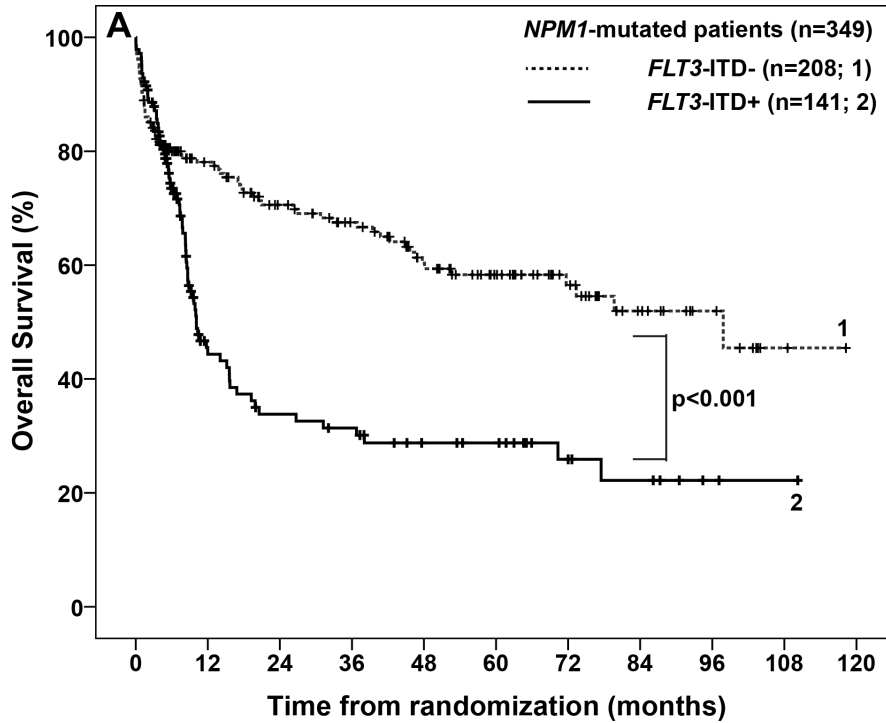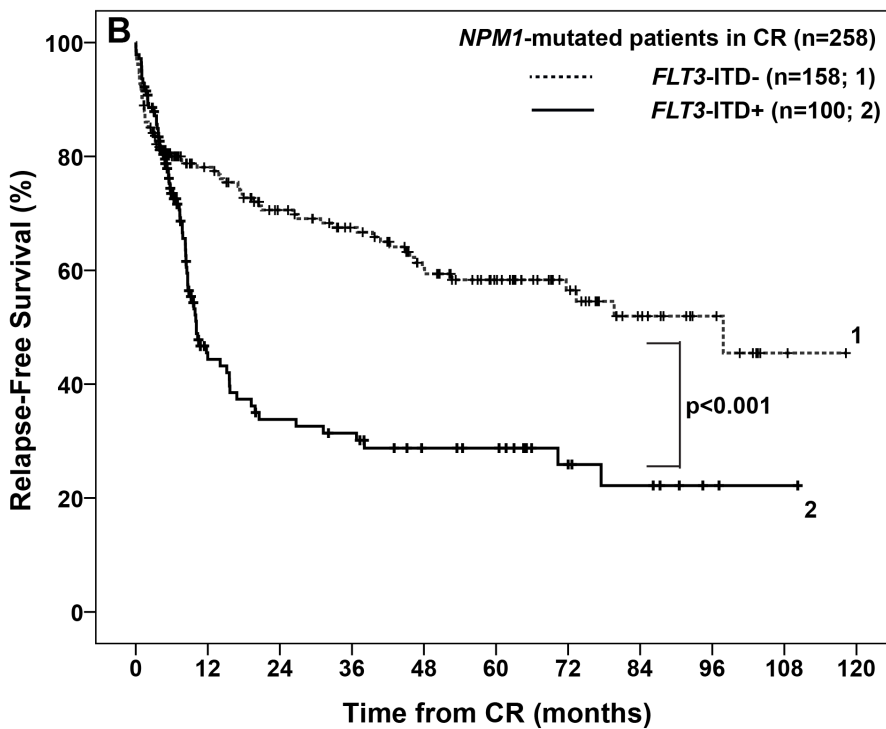

**Figure S3: Overall Survival (OS) and Relapse-Free Survival (RFS) in 292 patients with cytogenetically normal acute myeloid leukemia and *NPM1* mutation treated in the AMLCG99 study, not receiving allogeneic transplantation.** (A) OS in patients with *NPM1* type A mutation versus *NPM1* rare type mutation. (B) OS in patients with *NPM1* type A mutation versus *NPM1* rare type mutation with or without an additional *FLT3*-ITD. (C) RFS in patients with *NPM1* type A mutation versus *NPM1* rare type mutation. (D) RFS in patients with *NPM1* type A mutation versus *NPM1* rare type mutation with or without an additional *FLT3*-ITD.

**Abbreviations:** CR, complete remission; *FLT3*-ITD+, presence of an internal tandem duplication in the *fms*-related tyrosine 3 gene; *FLT3*-ITD-, absence of an internal tandem duplication in the *fms*-related tyrosine 3 gene; *NPM1*-A, mutation in the nucleophosmin gene consisting of an insertion of the tetranucleotide TCTG; *NPM1*-RA, mutation in the nucleophosmin gene other than type A.

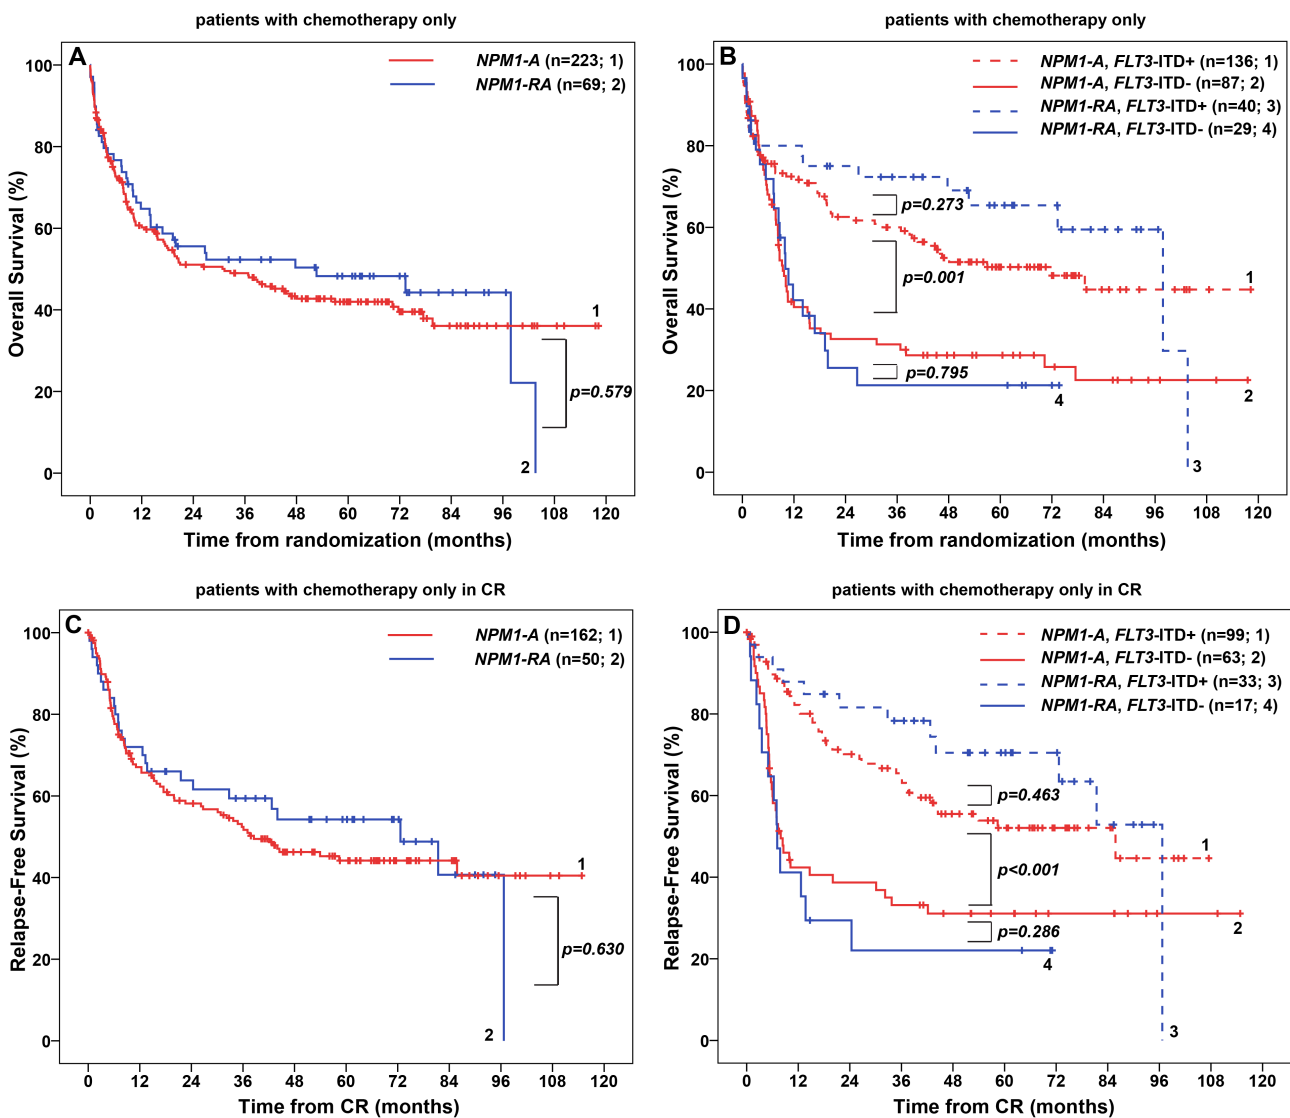

**Figure S4: Overall Survival (OS) and Relapse-Free Survival (RFS) in 330 patients with de novo cytogenetically normal acute myeloid leukemia and *NPM1* mutation treated in the AMLCG99 study.** (A) OS in patients with *NPM1* type A mutation versus *NPM1* rare type mutation. (B) OS in patients with *NPM1* type A mutation versus *NPM1* rare type mutation with or without an additional *FLT3*-ITD. (C) RFS in patients with *NPM1* type A mutation versus *NPM1* rare type mutation. (D) RFS in patients with *NPM1* type A mutation versus *NPM1* rare type mutation with or without an additional *FLT3*-ITD.

**Abbreviations:** CR, complete remission; *FLT3*-ITD+, presence of an internal tandem duplication in the *fms*-related tyrosine 3 gene; *FLT3*-ITD-, absence of an internal tandem duplication in the *fms*-related tyrosine 3 gene; *NPM1*-A, mutation in the nucleophosmin gene consisting of an insertion of the tetranucleotide TCTG; *NPM1*-RA, mutation in the nucleophosmin gene other than type A.

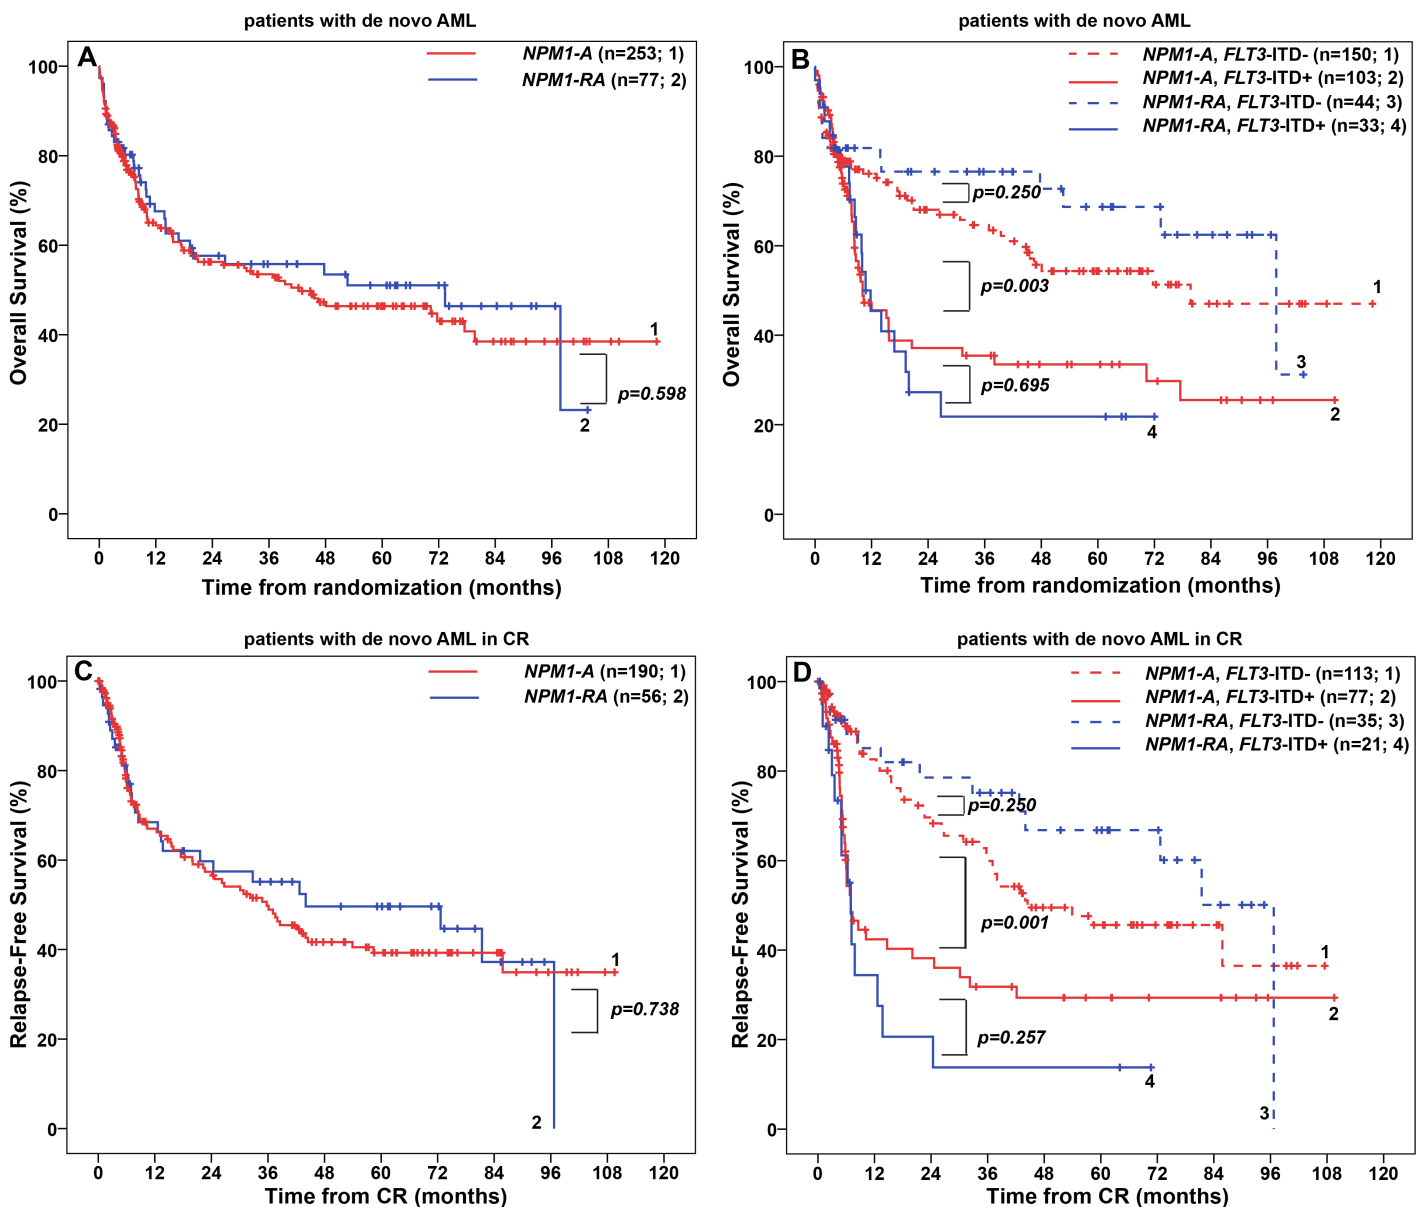

**Figure S5: Overall Survival (OS) and Relapse-Free Survival (RFS) in 197 patients <60 years and 152 patients ≥60 years with cytogenetically normal acute myeloid leukemia and *NPM1* mutation treated in the AMLCG99 study.** (A) OS in patients <60 years with *NPM1* type A mutation versus *NPM1* rare type mutation. (B) OS in patients ≥60 years with *NPM1* type A mutation versus *NPM1* rare type mutation. (C) RFS in patients <60 with *NPM1* type A mutation versus *NPM1* rare type mutation. (D) RFS in patients ≥60 with *NPM1* type A mutation versus *NPM1* rare type mutation.

**Abbreviations:** CR, complete remission; *FLT3*-ITD+, presence of an internal tandem duplication in the *fms*-related tyrosine 3 gene; *FLT3*-ITD-, absence of an internal tandem duplication in the *fms*-related tyrosine 3 gene; *NPM1*-A, mutation in the nucleophosmin gene consisting of an insertion of the tetranucleotide TCTG; *NPM1*-RA, mutation in the nucleophosmin gene other than type A.

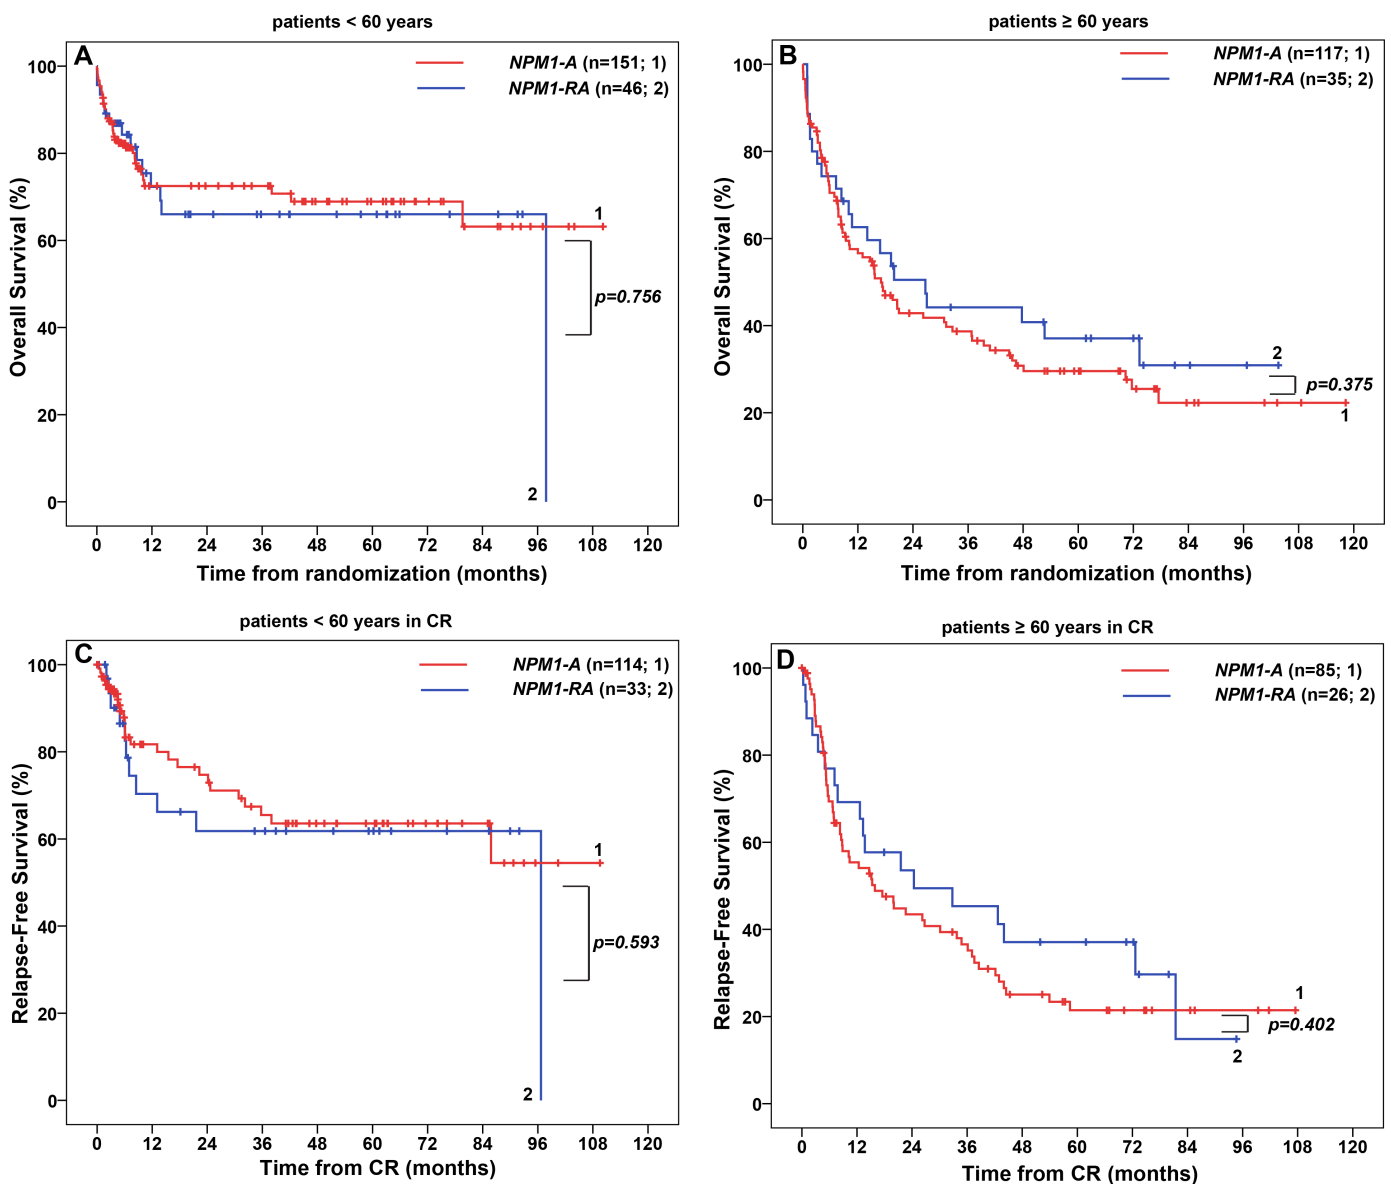

**References:**

1. Falini B, Mecucci C, Tiacci E, Alcalay M, Rosati R, Pasqualucci L, et al. Cytoplasmic nucleophosmin in acute myelogenous leukemia with a normal karyotype. *N Engl J Med*. 2005 Jan 20;352(3):254–66.
2. Cazzaniga G, Grazia Dell'Oro M, Mecucci C, Giarin E, Masetti R, Rossi V, et al. Nucleophosmin mutations in childhood acute myelogenous leukemia with normal karyotype. *Blood*. 2005 Aug 15;106(4):1419–22.
3. Suzuki T, Kiyoi H, Ozeki K, Tomita A, Yamaji S, Suzuki R, et al. Clinical characteristics and prognostic implications of NPM1 mutations in acute myeloid leukemia. *Blood*. 2005 Oct 15;106(8):2854–61.
4. Schnittger S, Schoch C, Kern W, Mecucci C, Tschulik C, Martelli MF, et al. Nucleophosmin gene mutations are predictors of favorable prognosis in acute myelogenous leukemia with a normal karyotype. *Blood*. 2005 Dec 1;106(12):3733–9.
5. Dohner K, Schlenk RF, Habdank M, Scholl C, Rücker FG, Corbacioglu A, et al. Mutant nucleophosmin (NPM1) predicts favorable prognosis in younger adults with acute myeloid leukemia and normal cytogenetics: interaction with other gene mutations. *Blood*. 2005 Dec 1;106(12):3740–6.
